# Supplementary material
Source: Royal Society of Chemistry journal article supplement (doi:10.1039/d6ma00006a)
Supplement: d6ma00006a1.pdf [file d6ma00006a1.pdf]

The adsorption capacity and % removal was calculated using following equations.

$$q_e = (C_0 - C_e)V / m \dots\dots\dots (1)$$

where  $C_0$  and  $C_e$  (mg/L) are the initial and equilibrium concentrations of dyes, respectively;  $V$  (L) is the volume of the solution; and  $m$  (g) is the synthesized materials.

$$R (\%) = (C_0 - C / C_0) X 100 \dots\dots\dots(2)$$

where  $C_0$  is the initial concentration of dye,  $C$  is the equilibrium concentration,  $V$  is the volume of the solution,  $m$  is the mass of adsorbate.

By applying pseudo-first-order (PFO) along with pseudo-second-order (PSO) models, the kinetic behaviour of RR-195 sorption onto the  $Fe_3O_4$ -adn-(1,3,5-triazine-2,4,6-triyl)triproline nanocomposite was examined (Fig. 13). Eqs. (3) and (4), correspondingly, are the linear equations for PFO and PSO, and Table 1 provides a summary of the fitting parameters.

$$\log (q_e - q_t) = \log q_e - \frac{k_1}{2.303} \cdot t \dots (3)$$

$$\frac{t}{q_t} = \frac{1}{(k_2 \cdot q_e^2)} + \frac{1}{q_e} t \dots (4)$$

The Langmuir isotherm model, which assumes monolayer adsorption on a homogeneous surface with a finite number of energetically equivalent adsorption sites, is expressed as:

$$q_e = \frac{q_{max} K_L C_e}{1 + K_L C_e} \dots\dots\dots(5)$$

where  $q_e$  ( $mgg^{-1}$ ) is the equilibrium adsorption capacity,  $q_{max}$  ( $mgg^{-1}$ ) is the maximum monolayer adsorption capacity,  $K_L$  ( $L mg^{-1}$ ) is the Langmuir constant related to adsorption affinity, and  $C_e$  ( $mg L^{-1}$ ) is the equilibrium dye concentration.

The Freundlich isotherm model, applicable to heterogeneous surfaces and multilayer adsorption, is expressed as:

$$q_e = K_f C_e^{1/n} \dots\dots\dots(6)$$

where  $K_f$  is the Freundlich adsorption constant and  $1/n$  represents adsorption intensity.
